# Supplementary material
Source: Springer Nature journal article supplement (https://www.springermedizin.de/resource/supplementary/12958_2012_1039_MOESM7_ESM.pdf/9566422)

early P cessation      P continuation

Risk Ratio

Risk Ratio

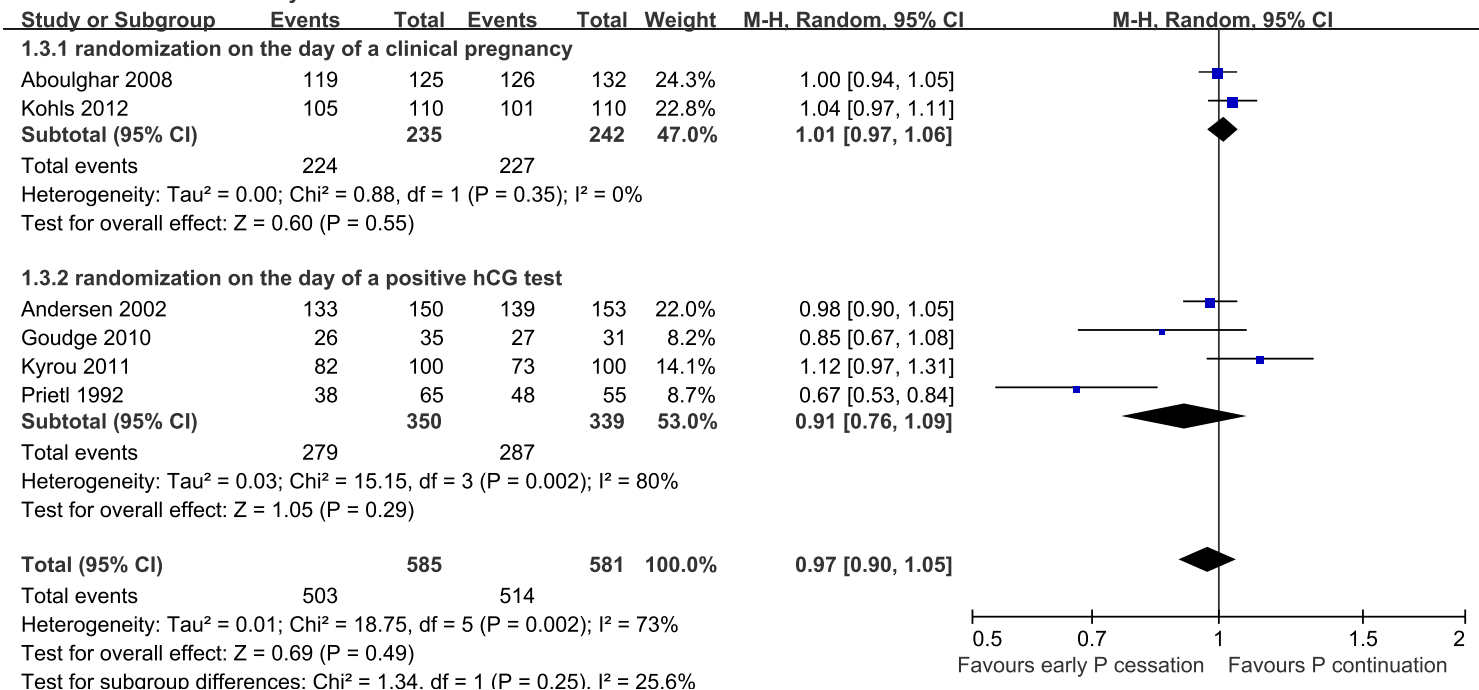

Supplement: MOESM7 [file 9566422]
